# Supplementary material for: Olive oil intake and cardiovascular disease, cancer, and all-cause mortality: a systematic review and dose–response meta-analysis of prospective cohort studies
Source: Royal Society of Chemistry journal article supplement (doi:10.1039/d3fo05246j), 2024-01-01
Supplement: d3fo05246j1.pdf [file d3fo05246j1.pdf]

## Online Supplementary Materials

### Supplementary Table legend:

Table S1 Systematic literature review search terms and strategy.

Table S2 List of excluded studies and exclusion reason.

Table S3 Characteristics of studies included in the analysis.

Table S4 Quality assessment of included cohort studies (Newcastle-Ottawa Scale).

Table S5 Sensitivity analyses by systematic removal of each study (highest versus lowest category).

Table S6 Sensitivity analyses by systematic removal of each study (per 10 g/d olive oil intake)

Table S7 GRADE evidence table for the association of olive oil intake with the risk of cardiovascular disease, cancer, and all-cause mortality.

**Supplementary Figure legend:**

Fig. S1 The flowchart of article selection.

Fig. S2 Funnel plot for publication bias for risk of CVD mortality with highest versus lowest olive oil intake levels.

Fig. S3 Funnel plot for publication bias for risk of all-cause mortality with highest versus lowest olive oil intake levels.

Table S1 Systematic literature review search terms and strategy.

| Search terms for PubMed (1,483)                                                                                                                                                                                                                                                                                                                                                                                                                                                                                                                                                                                                                                                                                                                                                                                                                                                                                                                                                                                                                                                                                                 |
|---------------------------------------------------------------------------------------------------------------------------------------------------------------------------------------------------------------------------------------------------------------------------------------------------------------------------------------------------------------------------------------------------------------------------------------------------------------------------------------------------------------------------------------------------------------------------------------------------------------------------------------------------------------------------------------------------------------------------------------------------------------------------------------------------------------------------------------------------------------------------------------------------------------------------------------------------------------------------------------------------------------------------------------------------------------------------------------------------------------------------------|
| <p>#1 ("Olive Oil"[MeSH Terms] OR "Olive Oil"[Title/Abstract] OR "oil, olive"[Title/Abstract] OR "oils, olive"[Title/Abstract] OR "olive oils"[Title/Abstract] OR "diet, Mediterranean"[Title/Abstract] OR "Mediterranean diet"[Title/Abstract])</p>                                                                                                                                                                                                                                                                                                                                                                                                                                                                                                                                                                                                                                                                                                                                                                                                                                                                            |
| <p>#2 ("Cerebrovascular Disorders"[MeSH Terms] OR "Cardiovascular Diseases"[MeSH Terms] OR "Cerebrovascular Disorders"[Title/Abstract] OR "Cardiovascular Diseases"[Title/Abstract] OR "cardiovascular disease"[Title/Abstract] OR "CVD"[Title/Abstract] OR "coronary disease"[Title/Abstract] OR "coronary artery disease"[Title/Abstract] OR "coronary heart disease"[Title/Abstract] OR "CHD"[Title/Abstract] OR "ischemic heart disease"[Title/Abstract] OR "ischaemic heart disease"[Title/Abstract] OR "Stroke"[Title/Abstract] OR "ischemic stroke"[Title/Abstract] OR "haemorrhagic stroke"[Title/Abstract] OR "myocardial ischemia"[Title/Abstract] OR "MI"[Title/Abstract] OR "heart failure"[Title/Abstract] OR "cerebral vascular accident"[Title/Abstract] OR "CVA"[Title/Abstract] OR "Cardiovascular"[Title/Abstract] OR "Coronary"[Title/Abstract] OR "Myocardial"[Title/Abstract] OR "Neoplasms"[MeSH Terms] OR "Neoplasms"[Title/Abstract] OR "Neoplasm"[Title/Abstract] OR "Cancer"[Title/Abstract] OR "Tumor"[Title/Abstract] OR "carcinoma"[Title/Abstract] OR "Mortality"[MeSH Terms] OR "Death"[MeSH</p> |

Terms] OR "Mortality"[Title/Abstract] OR "Death"[Title/Abstract] OR "fatal"[Title/Abstract] OR "deaths"[Title/Abstract])

#3 ("cohort Studies"[MeSH Terms] OR "follow-up"[Title/Abstract] OR "longitudinal"[Title/Abstract] OR "cohort"[Title/Abstract] OR "prospective"[Title/Abstract])

#1 AND #2 AND #3

### **Search terms for Embase (2,713)**

#1 Olive Oil/ OR Mediterranean diet/ OR oil, olive.mp. OR olive oil.mp. OR oils, olive.mp. OR olive oils.mp. OR Mediterranean diet.mp. OR diet, Mediterranean.mp.

#2 cardiovascular disease/ OR coronary artery disease/ OR cerebrovascular accident/ OR brain hemorrhage/ OR heart failure/ OR ischemic heart disease/ OR cerebrovascular disorders.mp. OR cardiovascular diseases.mp. OR cardiovascular disease.mp. OR CVD.mp. OR coronary disease.mp. OR coronary artery disease.mp. OR coronary heart disease.mp. OR CHD.mp. OR ischaemic heart disease.mp. OR stroke.mp. OR ischemic stroke.mp. OR haemorrhagic stroke.mp. OR myocardial ischemia.mp. OR MI.mp. OR heart failure.mp. OR cerebral vascular accident.mp. OR CVA.mp. OR cardiovascular.mp. OR coronary.mp. OR myocardial.mp. OR Neoplasm/ OR carcinoma/ OR neoplasms.mp. OR neoplasm.mp. OR cancer.mp. OR tumor.mp. OR carcinoma.mp. OR mortality/ OR all cause mortality/ OR death/ OR mortality.mp. OR all cause mortality.mp. OR death.mp. OR deaths.mp. OR fatal.mp.

#3 cohort studies/ OR follow up/ OR prospective study/ OR longitudinal study/ OR follow-up.mp. OR cohort studies.mp. OR prospective cohort studies.mp. OR

cohort.mp. OR longitudinal.mp.

#1 AND #2 AND #3

**Search terms for Web of Science (3,664)**

#1 ("Olive Oil" OR "oil, olive" OR "oils, olive" OR "olive oils" OR "Mediterranean diet" OR "diet, Mediterranean")

#2 ("cerebrovascular Disorders" OR "Cardiovascular Diseases" OR "cardiovascular disease" OR "CVD" OR "coronary disease" OR "coronary artery disease" OR "coronary heart disease" OR "CHD" OR "ischemic heart disease" OR "ischaemic heart disease" OR "stroke" OR "ischemic stroke" OR "haemorrhagic stroke" OR "myocardial ischemia" OR "MI" OR "heart failure" OR "cerebral vascular accident" OR "CVA" OR "cardiovascular" OR "coronary" OR "myocardial" OR "neoplasms" OR "neoplasm" OR "cancer" OR "tumor" OR "carcinoma" OR "mortality" OR "death" OR "fatal" OR "deaths")

#3 ("cohort Studies" OR "follow-up" OR "longitudinal" OR "cohort" OR "prospective")

#1 AND #2 AND #3

Table S2 List of excluded studies and exclusion reason

| Exclusion reason                         | Reference number |
|------------------------------------------|------------------|
| Exposure or outcome of no interest (n=9) | [1-9]            |
| Not usable results (n=6)                 | [10-15]          |
| Duplicate cohort studies (n=4)           | [16-19]          |
| Not prospective cohort (n=14)            | [20-33]          |
| Conference articles or comments (n=8)    | [33-41]          |

### References:

1. P. Bazal, F. Aros, E. Toledo, A. Gea, M. Fiol, J. Salas-Salvado, D. Corella, M. Fito, E. Gomez-Gracia, J. Lapetra, L. Serra-Majem, X. Pinto, E. Ros, M. A. Martinez-Gonzalez and M. Ruiz-Canela, Mediterranean alcohol drinking pattern and risk of atrial fibrillation in the PREDIMED study, *European Heart Journal*, 2016, 37(Supplement 1), 1347.
2. G. T. Hanley-Cook, I. Huybrechts, C. Biessy, R. Remans, G. Kennedy, M. Deschasaux-Tanguy, K. A. Murray, M. Touvier, G. Skeie, E. Kesse-Guyot, A. Argaw, C. Casagrande, G. Nicolas, P. Vineis, C. J. Millett, E. Weiderpass, P. Ferrari, C. C. Dahm, H. B. Bueno-de-Mesquita, T. M. Sandanger, D. B. Ibsen, H. Freisling, S. Ramne, F. Jannasch, Y. T. van der Schouw, M. B. Schulze, K. K. Tsilidis, A. Tjønneland, E. Ardanaz, S. Bodén, L. Cirera, G. Gargano, J. Halkjær, P. Jakszyn, I. Johansson, V. Katzke, G. Masala, S. Panico, M. Rodriguez-Barranco, C. Sacerdote, B. Srour, R. Tumino, E. Riboli, M. J. Gunter, A. D. Jones and C. Lachat, Food biodiversity and total and cause-specific mortality in 9 European countries: An analysis of a prospective cohort study, *PLoS Med*, 2021, 18, e1003834.
3. M. D. Holmes, D. J. Hunter, G. A. Colditz, M. J. Stampfer and S. E. Hankinson, Association of dietary intake of fat and fatty acids with risk of breast cancer, *Jama-Journal of the American Medical Association*, 1999, 281, 914-920.
4. L. Mao, Y. Zhang, W. Wang, P. Zhuang, F. Wu and J. Jiao, Plant-sourced and animal-sourced monounsaturated fatty acid intakes in relation to mortality: a prospective nationwide cohort study, *European Journal of Nutrition*, 2020, 59, 1989-1998.
5. G. Masala, M. Ceroti, V. Pala, V. Krogh, P. Vineis, C. Sacerdote, C. Saieva, S. Salvini, S. Sieri, F. Berrino, S. Panico, A. Mattiello, R. Tumino, M. C. Giurdanella, C. Bamia, A. Trichopoulou, E. Riboli and D. Palli, A dietary pattern rich in olive oil and raw vegetables is associated with lower mortality in Italian elderly subjects, *British Journal of Nutrition*, 2007, 98(2), 406-415.
6. E. Molina-Montes, M.-J. Sanchez, G. Buckland, H. B. Bueno-de-Mesquita, E. Weiderpass, P. Amiano, P. A. Wark, T. Kuehn, V. Katzke, J. Maria Huerta, E. Ardanaz, J. Ramon Quiros, A. Affret, M. His, M.-C. Boutron-Ruault, P. H. Peeters, W. Ye, M. Sund, H. Boeing, K. Iqbal, B. Ohlsson, E. Sonestedt, A. Tjønneland, K. E. N. Petersen, R. C. Travis, G. Skeie, C. Agnoli, S. Panico, D. Palli, R. Tumino, C. Sacerdote, H. Freisling, I. Huybrechts, K. Overvad, A.

- Trichopoulou, C. Bamia, E. Vasilopoulou, N. Wareham, K.-T. Khaw, A. J. Cross, H. A. Ward, E. Riboli and E. J. Duell, Mediterranean diet and risk of pancreatic cancer in the European Prospective Investigation into Cancer and Nutrition cohort, *British Journal of Cancer*, 2017, 116, 811-820.
7. H. Montero Salazar, R. d. D. Mendonca, M. Laclaustra, B. Moreno-Franco, A. Akesson, P. Guallar-Castillon and C. Donat-Vargas, The intake of flavonoids, stilbenes, and tyrosols, mainly consumed through red wine and virgin olive oil, is associated with lower carotid and femoral subclinical atherosclerosis and coronary calcium, *European Journal of Nutrition*, 2022, 61, 2697-2709.
  8. E. L. Van Blarigan, C. Ma, F.-S. Ou, T. M. Bainter, A. P. Venook, K. Ng, D. Niedzwiecki, E. Giovannucci, H.-J. Lenz, B. N. Polite, H. S. Hochster, R. M. Goldberg, R. J. Mayer, C. D. Blanke, E. M. O'Reilly, K. K. Ciombor and J. A. Meyerhardt, Dietary fat in relation to all-cause mortality and cancer progression and death among people with metastatic colorectal cancer: Data from CALGB 80405 (Alliance)/SWOG 80405, *International Journal of Cancer*, 2022, DOI: 10.1002/ijc.34230.
  9. Z. Vazquez-Ruiz, E. Toledo, F. Vitelli-Storelli, L. Goni, V. de la O, M. Bes-Rastrollo and M. Angel Martinez-Gonzalez, Effect of Dietary Phenolic Compounds on Incidence of Cardiovascular Disease in the SUN Project; 10 Years of Follow-Up, *Antioxidants*, 2022, 11.
  10. A. Alonso and M. A. Martinez-Gonzalez, Olive oil consumption and reduced incidence of hypertension: The SUN study, *Lipids*, 2004, 39, 1233-1238.
  11. G. Masala, D. Ambrogetti, M. Assedi, D. Giorgi, M. R. Del Turco and D. Palli, Dietary and lifestyle determinants of mammographic breast density. A longitudinal study in a Mediterranean population, *International Journal of Cancer*, 2006, 118(7), 1782-1789.
  12. E. Oikonomou, G. Siasos, S. Tsalamandris, E. Kokkou, N. Papageorgiou, K. Zisimos, A. Antonopoulos, T. Zografos, G. Vogiatzi, K. Kalogeras, M. Vavuranakis and D. Tousoulis, Dietary consumption of olive oil and cardiovascular outcome in patients with coronary artery disease, *Journal of the American College of Cardiology*, 2017, 69(11 Supplement 1), 146.
  13. E. Oikonomou, G. Siasos, M. Zaromytidou, S. Tsalamandris, K. Mourouzis, M. Anastasiou, E. Dimitropoulos, K. Zisimos, K. Maniatis and D. Tousoulis, Olive oil consumption can favorably affect cardiovascular prognosis in patients after percutaneous coronary intervention, *European Heart Journal*, 2015, 1), 475.
  14. T. Psaltopoulou, A. Naska, P. Orfanos, D. Trichopoulos, T. Mountokalakis and A. Trichopoulou, Olive oil, the Mediterranean diet, and arterial blood pressure: the Greek European Prospective Investigation into Cancer and Nutrition (EPIC) study, *The American journal of clinical nutrition*, 2004, 80(4), 1012-1018.
  15. A. Seidita, M. Soresi, L. Giannitrapani, V. Di Stefano, R. Citarrella, L. Mirarchi, A. Cusimano, G. Augello, A. Carroccio, J. L. Iovanna and M. Cervello, The clinical impact of an extra virgin olive oil enriched mediterranean diet on metabolic syndrome: Lights and shadows of a nutraceutical approach, *Front Nutr*, 2022, 9, 980429.
  16. P. Bazal, A. Gea, C. de la Fuente-Arrillaga, M. T. Barrio-Lopez, M. A. Martinez-Gonzalez and M. Ruiz-Canela, Olive oil intake and risk of atrial fibrillation in the SUN cohort, *Nutrition, Metabolism and Cardiovascular Diseases*, 2019, 29(5), 450-457.
  17. G. Buckland, A. Agudo, N. Travier, J. M. Huerta, L. Cirera, M. J. Tormo, C. Navarro, M. D. Chirlaque, C. Moreno-Iribas, E. Ardanaz, A. Barricarte, J. Etxeberria, P. Marin, J. R. Quirós,

- M. L. Redondo, N. Larrañaga, P. Amiano, M. Dorronsoro, L. Arriola, M. Basterretxea, M. J. Sanchez, E. Molina and C. A. González, Adherence to the Mediterranean diet reduces mortality in the Spanish cohort of the European Prospective Investigation into Cancer and Nutrition (EPIC-Spain), *Br J Nutr*, 2011, 106, 1581-1591.
18. G. Buckland, N. Travier, A. Barricarte, E. Ardanaz, C. Moreno-Iribas, M. J. Sanchez, E. Molina-Montes, M. D. Chirlaque, J. M. Huerta, C. Navarro, M. L. Redondo, P. Amiano, M. Dorronsoro, N. Larranaga and C. A. Gonzalez, Olive oil intake and CHD in the European Prospective Investigation into Cancer and Nutrition Spanish cohort, *British Journal of Nutrition*, 2012, 108(11), 2075-2082.
  19. A. Trichopoulou, C. Bamia, P. Lagiou and D. Trichopoulos, Conformity to traditional Mediterranean diet and breast cancer risk in the Greek EPIC (European Prospective Investigation into Cancer and Nutrition) cohort, *American Journal of Clinical Nutrition*, 2010, 92(3), 620-625.
  20. S. Al-Ghamdi, The association between olive oil consumption and primary prevention of cardiovascular diseases, *J Family Med Prim Care*, 2018, 7, 859-864.
  21. S. G. Chrysant and G. S. Chrysant, Olive Oil Consumption and Cardiovascular Protection: Mechanism of Action, *Cardiology in review.*, 2022, 15.
  22. P. Crosignani, A. Russo, G. Tagliabue and F. Berrino, Tobacco and diet as determinants of survival in male laryngeal cancer patients, *Int J Cancer*, 1996, 65, 308-313.
  23. M. Farras, E. Almanza-Aguilera, A. Hernaez, N. Agusti, J. Julve, M. Fito and O. Castaner, Beneficial effects of olive oil and Mediterranean diet on cancer physio-pathology and incidence, *Seminars in Cancer Biology*, 2021, 73, 178-195.
  24. J. F. García-Gavilán, N. Babio, E. Toledo, Z. Semnani-Azad, C. Razquin, C. Dennis, A. Deik, D. Corella, R. Estruch, E. Ros, M. Fitó, F. Arós, M. Fiol, J. Lapetra, R. Lamuela-Raventos, C. Clish, M. Ruiz-Canela, M. Martínez-González, F. Hu, J. Salas-Salvadó and M. Guasch-Ferré, Olive oil consumption, plasma metabolites, and risk of type 2 diabetes and cardiovascular disease, *Cardiovasc Diabetol*, 2023, 22, 340.
  25. N. Katsiki, P. Perez-Martinez and J. Lopez-Miranda, Olive Oil Intake and Cardiovascular Disease Prevention: "Seek and You Shall Find", *Current Cardiology Reports*, 2021, 23(6) (no pagination).
  26. K. Lotfi, A. Salari-Moghaddam, M. Yousefinia, B. Larijani and A. Esmailzadeh, Dietary intakes of monounsaturated fatty acids and risk of mortality from all causes, cardiovascular disease and cancer: A systematic review and dose-response meta-analysis of prospective cohort studies, *Ageing Research Reviews*, 2021, 72.
  27. C. Markellos, M. E. Ourailidou, M. Gavriatopoulou, P. Halvatsiotis, T. N. Sergentanis and T. Psaltopoulou, Olive oil intake and cancer risk: A systematic review and meta-analysis, *PLoS ONE*, 2022, 17(1 January) (no pagination).
  28. M. A. Martínez-González, C. Sayón-Orea, V. Bullón-Vela, M. Bes-Rastrollo, F. Rodríguez-Artalejo, M. J. Yusta-Boyo and M. García-Solano, Effect of olive oil consumption on cardiovascular disease, cancer, type 2 diabetes, and all-cause mortality: A systematic review and meta-analysis, *Clin Nutr*, 2022, 41, 2659-2682.
  29. J. M. Martinmoreno, W. C. Willett, L. Gorgojo, J. R. Banegas, F. Rodriguezartalejo, J. C. Fernandezrodriguez, P. Maisonneuve and P. Boyle, DIETARY-FAT, OLIVE OIL INTAKE AND BREAST-CANCER RISK, *International Journal of Cancer*, 1994, 58, 774-780.



30. K. Rees, A. Takeda, N. Martin, L. Ellis, D. Wijesekara, A. Vepa, A. Das, L. Hartley and S. Stranges, Mediterranean-style diet for the primary and secondary prevention of cardiovascular disease, *Cochrane Database of Systematic Reviews*, 2019, 2019(3) (no pagination).
31. N. Sealy, S. E. Hankinson and S. C. Houghton, Olive oil and risk of breast cancer: A systematic review and dose-response meta-analysis of observational studies, *British Journal of Nutrition*, 2021, 125(10), 1148-1156.
32. N. R. Simonsen, J. F. C. Navajos, J. M. Martin-Moreno, J. J. Strain, J. K. Huttunen, B. C. Martin, M. Thamm, A. F. M. Kardinaal, P. van't Veer, F. J. Kok and L. Kohlmeier, Tissue stores of individual monounsaturated fatty acids and breast cancer: the EURAMIC study, *American Journal of Clinical Nutrition*, 1998, 68, 134-141.
33. M. Xia, Y. Zhong, Y. Peng and C. Qian, Olive oil consumption and risk of cardiovascular disease and all-cause mortality: A meta-analysis of prospective cohort studies, *Frontiers in Nutrition*, 2022, 9.
34. C. Bamia, S. Siakavellas, G. Bamias and A. Trichopoulou, Dietary intake and gastric cancer risk in the Greek EPIC cohort study, *Annals of Nutrition and Metabolism*, 2011, 3), 363.
35. M. Guasch, G. Liu, Y. Li, L. Sampson, J. E. Manson, J. Salas-Salvado, M. A. Martinez-Gonzalez, M. J. Stampfer, W. Willett, Q. Sun and F. B. Hu, Olive oil consumption and risk of cardiovascular disease, *Circulation. Conference: American Heart Association's Epidemiology and Prevention/Lifestyle and Cardiometabolic Health*, 2020, 141.
36. S. C. Larsson, Can Small Amounts of Olive Oil Keep the Death Away?, *Journal of the American College of Cardiology*, 2022, 79(2), 113-115.
37. A. Mayen, G. Buckland, A. Agudo, C. Navarro, J. Huerta, M. Chirlaque, A. Barricarte, E. Ardanaz, C. Moreno-Iribas, P. Marin, R. Quiros, M. Redondo, P. Amiano, M. Dorronsoro, L. Arriola, E. Molina, M. Sanchez and C. Gonzalez, Olive oil intake and mortality within the spanish population (epic-spain), *Annals of Nutrition and Metabolism*, 2011, 3), 273.
38. J. M. Nunez-Cordoba, M. Bes-Rastrollo, E. Toledo, A. Gea, M. Ruiz-Canela and M. A. Martinez-Gonzalez, Cardiovascular preventive effect of fruits and vegetables: Is it modified by olive oil consumption?, *Annals of Nutrition and Metabolism*, 2013, 1), 237.
39. P. Pablo Bazal, A. Gea, C. De La Fuente-Arrillaga, M. T. Barrio-Lopez, M. A. Martinez-Gonzalez and M. Ruiz-Canela, Olive consumption and risk of atrial fibrillation on a young Spanish cohort, *European Journal of Preventive Cardiology*, 2019, 26(Supplement 1), S72.
40. L. Zubiri Oteiza, D. Martinez-Urbistondo, A. Hernandez Hernandez, C. De La Fuente and M. Marrtinez-Gonzalez, Olive oil consumption and incidence of premenopausal breast cancer in the Spanish sun cohort, *Annals of Nutrition and Metabolism*, 2011, 3), 358-359.
41. G. Hoffmann and L. Schwingshackl, Mediterranean diet supplemented with extra virgin olive oil reduces the incidence of invasive breast cancer in a randomised controlled trial, *Evidence-Based Medicine*, 2016, 21(2), 72.

Table S3 Characteristics of studies included in the analysis.

| <b>Author, publication year (region)</b> | <b>Study name</b>                                               | <b>Sex</b> | <b>Age (years), mean or range</b> | <b>Follow up years or person-years</b> | <b>Sample size</b> | <b>Type of outcome</b>  | <b>Cases</b> | <b>Exposure assessment</b> | <b>Outcome assessment</b>                                                                                      | <b>Covariates</b>                                                                                                                                                                                                                                            |
|------------------------------------------|-----------------------------------------------------------------|------------|-----------------------------------|----------------------------------------|--------------------|-------------------------|--------------|----------------------------|----------------------------------------------------------------------------------------------------------------|--------------------------------------------------------------------------------------------------------------------------------------------------------------------------------------------------------------------------------------------------------------|
| Bonfiglio et al., 2023 (Italy)           | Multicenter Italian study on Cholelithiasis (MICOL)             | M/F        | 54.9                              | 192,264.25                             | 2754               | All-cause mortality     | 675          | FFQ                        | electronically linked with the database                                                                        | sex, kcal without available fats, total cholesterol high-density lipoprotein cholesterol, aspartate transaminase, body mass index, diastolic blood pressure, relative Mediterranean Scoring System with no oil consumption and smoke adjusted for ethnicity, |
| Romanos-Nanclares et al., 2023 (USA)     | Nurses' Health Study (NHS) and Nurses' Health Study II (NHS II) | F          | 47.1                              | 3744068                                | 164,625            | Breast cancer incidence | 9638         | FFQ                        | confirmed via medical record review and self-reported cases confirmed by the nurse but lacking medical records | Southern European/Mediterranean ancestry, age at menarche, menopausal status and age at menopause, postmenopausal hormone use, oral contraceptive use history, parity and age at                                                                             |

|                                     |                                             |     |      |    |        |                     |        |     |                                                                                                                    |                                                                                                                                                                                                                                                                                                                                                                                                                |
|-------------------------------------|---------------------------------------------|-----|------|----|--------|---------------------|--------|-----|--------------------------------------------------------------------------------------------------------------------|----------------------------------------------------------------------------------------------------------------------------------------------------------------------------------------------------------------------------------------------------------------------------------------------------------------------------------------------------------------------------------------------------------------|
| Torres-Collado et al., 2022 (Spain) | Valencian Nutrition Survey (VNS)            | M/F | 45.9 | 18 | 1,567  | all-cause mortality | 317    | FFQ | Verified through the National Death Index from the Mortality Registry (ICD-10)                                     | first birth, breastfeeding history, family history of breast cancer, history of biopsy-confirmed benign breast disease, height, cumulatively updated total caloric intake, physical activity, neighborhood-based socio-economic status indicator, BMI at age 18 and AHEI-2010. age (in years), sex, educational level, BMI, smoking habit, TV watching, and self-reported diseases (diabetes and hypertension) |
|                                     |                                             |     |      |    | 1,365  | CVD mortality       | 115    |     |                                                                                                                    |                                                                                                                                                                                                                                                                                                                                                                                                                |
|                                     |                                             |     |      |    | 1,332  | cancer mortality    | 82     |     |                                                                                                                    |                                                                                                                                                                                                                                                                                                                                                                                                                |
| Guasch-Ferré et al., 2022 (USA)     | Health Professionals Follow-up study (HPFS) | M   | 56   | 28 | 31,801 | all-cause mortality | 14,256 | FFQ | determined by physician review of medical records, medical reports, autopsy reports, or death certificates (ICD-9) | age, calendar time, ethnicity, Southern European/Mediterranean ancestry, marital status, living alone, smoking status, alcohol intake, physical activity, family history of diabetes, family                                                                                                                                                                                                                   |
|                                     |                                             |     |      |    |        | CVD mortality       | 4,084  |     |                                                                                                                    |                                                                                                                                                                                                                                                                                                                                                                                                                |
|                                     |                                             |     |      |    |        | cancer mortality    | 3,764  |     |                                                                                                                    |                                                                                                                                                                                                                                                                                                                                                                                                                |

|                                   |                                                     |     |       |      |        |                     |        |                                                  |                                                                                                                    |                                                                                                                                                                                                                                                                                                                               |
|-----------------------------------|-----------------------------------------------------|-----|-------|------|--------|---------------------|--------|--------------------------------------------------|--------------------------------------------------------------------------------------------------------------------|-------------------------------------------------------------------------------------------------------------------------------------------------------------------------------------------------------------------------------------------------------------------------------------------------------------------------------|
|                                   | Nurses' Health Study (NHS)                          | F   | 56    | 28   | 60,582 | all-cause mortality | 22,768 | FFQ                                              | determined by physician review of medical records, medical reports, autopsy reports, or death certificates (ICD-8) | history of myocardial infarction or cancer, personal history of hypertension or hypercholesterolemia, multivitamin use, aspirin use, in women postmenopausal status and menopausal hormone use, total energy intake, and body mass index, intake of red meat, fruits and vegetables, nuts, soda, whole grains, and trans fats |
|                                   |                                                     |     |       |      |        | CVD mortality       | 4,737  |                                                  |                                                                                                                    |                                                                                                                                                                                                                                                                                                                               |
|                                   |                                                     |     |       |      |        | cancer mortality    | 5,708  |                                                  |                                                                                                                    |                                                                                                                                                                                                                                                                                                                               |
| Donat-Vargas et al., 2022 (Spain) | Nutrition and Cardiovascular Risk in Spain (ENRICA) | M/F | 18-96 | 10.7 | 12,161 | all-cause mortality | 739    | used a validated computer-based dietary history; | used the Spanish National Death Index that contains information on the vital status of all residents in Spain      | age, sex, total energy intake, educational level, smoking status, BMI, physical activity, TV, alcohol consumption, fiber intake, Mediterranean diet, number of medications, hypertriglyceridemia, hypercholesterolemia, hypertension, diabetes, number of self-reported chronic conditions                                    |
|                                   |                                                     |     |       | 8.8  |        | CVD mortality       | 143    | structured questionnaire                         |                                                                                                                    |                                                                                                                                                                                                                                                                                                                               |
|                                   |                                                     |     |       | 8.8  |        | cancer mortality    | 146    |                                                  |                                                                                                                    |                                                                                                                                                                                                                                                                                                                               |

|                                   |                                                                                 |     |       |      |        |                  |       |                                                 |                                                                                                                             |                                                                                                                                                                                                                                                                                                                                  |
|-----------------------------------|---------------------------------------------------------------------------------|-----|-------|------|--------|------------------|-------|-------------------------------------------------|-----------------------------------------------------------------------------------------------------------------------------|----------------------------------------------------------------------------------------------------------------------------------------------------------------------------------------------------------------------------------------------------------------------------------------------------------------------------------|
| Donat-Vargas et al., 2022 (Spain) | The Sun project                                                                 | M/F | 18-91 | 10.8 | 18,266 | CVD incidence    | 150   | FFQ                                             | confirmed and adjudicated by a team of physicians of the SUN project after revision of the medical records of participants. | age, sex, total energy intake, stratified by calendar year of recruitment, years of university, smoking, number of cigarettes per day, physical activity, BMI, alcohol consumption, dietary fiber, fruits and vegetables, sodium intake, systolic and diastolic blood pressure, hypercholesterolemia, hypertension, and diabetes |
|                                   | European Prospective Investigation into Cancer and Nutrition (EPIC)-Spain study | M/F | 29-69 | 22.8 | 39,393 | CVD incidence    | 2,159 | used a validated computer-based dietary history | validated by hospital records, primary care records, and autopsy reports                                                    | age, sex, total energy intake, stratified by center, level of education, smoking, number of packs per day, physical activity, BMI, alcohol consumption, dietary fiber, fruits and vegetables, sodium intake, systolic and diastolic blood pressure, hypercholesterolemia, hypertension, and diabetes                             |
|                                   |                                                                                 |     |       |      |        | CHD incidence    | 1,300 |                                                 |                                                                                                                             |                                                                                                                                                                                                                                                                                                                                  |
|                                   |                                                                                 |     |       |      |        | stroke incidence | 938   |                                                 |                                                                                                                             |                                                                                                                                                                                                                                                                                                                                  |
|                                   |                                                                                 |     |       |      |        | incidence        |       |                                                 |                                                                                                                             |                                                                                                                                                                                                                                                                                                                                  |

|                                          |                                                                  |     |      |      |         |                          |       |     |                                                                                                                                                                                 |                                                                                                                                                                                                                                                                                                       |
|------------------------------------------|------------------------------------------------------------------|-----|------|------|---------|--------------------------|-------|-----|---------------------------------------------------------------------------------------------------------------------------------------------------------------------------------|-------------------------------------------------------------------------------------------------------------------------------------------------------------------------------------------------------------------------------------------------------------------------------------------------------|
| Dianatinasab et al., 2022 (13 countries) | Bladder Cancer Epidemiology and Nutritional Determinants (BLEND) | M/F | 60.4 | 11.4 | 547,183 | bladder cancer incidence | 1,425 | FFQ | according to the International Classification of Diseases for Oncology (ICD-O-3 code C67) using population-based cancer registries, health insurance records or medical records | age, gender, total energy intake in kilocalories, smoking status, sugar and sugar products, beers, wine, dressing and plant-based and fruit intakes                                                                                                                                                   |
| Guasch-Ferré et al., 2021 (USA)          | Health Professionals Follow-up study (HPFS)                      | M   | 65   | 24   | 31,797  | CVD incidence            | 4,310 | FFQ | confirmed through review of medical records                                                                                                                                     | age, ethnicity; Southern European and/or Mediterranean ancestry; smoking status; alcohol intake; physical activity; family history of diabetes; family history of myocardial infarction; cancer; baseline diabetes mellitus; hypertension or antihypertensive medication use; hypercholesterolemia or |
|                                          |                                                                  |     |      |      |         | CHD incidence            | 3,152 |     |                                                                                                                                                                                 |                                                                                                                                                                                                                                                                                                       |
|                                          |                                                                  |     |      |      |         | stroke incidence         | 1,158 |     |                                                                                                                                                                                 |                                                                                                                                                                                                                                                                                                       |
|                                          | Nurses' Health Study (NHS)                                       | F   | 67   | 24   | 61,181  | CVD incidence            | 5,487 | FFQ | confirmed through review of medical records                                                                                                                                     |                                                                                                                                                                                                                                                                                                       |

|                             |                                                                                                        |     |       |       |         |                     |         |     |                                                                                                                                                                           |                                                                                                                                                                                                                               |
|-----------------------------|--------------------------------------------------------------------------------------------------------|-----|-------|-------|---------|---------------------|---------|-----|---------------------------------------------------------------------------------------------------------------------------------------------------------------------------|-------------------------------------------------------------------------------------------------------------------------------------------------------------------------------------------------------------------------------|
|                             |                                                                                                        |     |       |       |         | CHD incidence       | 2,882   |     |                                                                                                                                                                           | medication use; multivitamin use; aspirin use; in women, postmenopausal status and menopausal hormone use; total energy intake; and body mass index                                                                           |
|                             |                                                                                                        |     |       |       |         | stroke incidence    | 2,644   |     |                                                                                                                                                                           |                                                                                                                                                                                                                               |
| Zhang et al., 2021 (USA)    | National Institutes of Health-American Association of Retired Persons (NIH-AARP) Diet and Health Study | M/F | 50-71 | 16    | 521,120 | all-cause mortality | 129,328 | FFQ | identified by annual linkage to the Social Security Administration Death Master searches of the National Death Index Plus File and confirmed by follow-up (ICD-9, ICD-10) | age, sex, BMI, race, education, marital status, household income, alcohol, vigorous physical activity, usual activity at work, perceived health condition, history of heart disease, stroke, diabetes, and cancer at baseline |
|                             |                                                                                                        |     |       |       |         | CVD mortality       | 38,747  |     |                                                                                                                                                                           |                                                                                                                                                                                                                               |
|                             |                                                                                                        |     |       |       |         | stroke mortality    | 5,605   |     |                                                                                                                                                                           |                                                                                                                                                                                                                               |
|                             |                                                                                                        |     |       |       |         | cancer mortality    | 45,783  |     |                                                                                                                                                                           |                                                                                                                                                                                                                               |
| Sadeghi et al., 2021 (Iran) | Isfahan Cohort Study (ICS)                                                                             | M/F | ≥35   | 11.25 | 5,432   | all-cause mortality | 458     | FFQ | verified by medical records, hospital records, death certificates, and verbal                                                                                             | age, sex, education, residency, smoking status, daily physical activity, family history of cardiovascular disease,                                                                                                            |
|                             |                                                                                                        |     |       |       |         | CVD mortality       | 179     |     |                                                                                                                                                                           |                                                                                                                                                                                                                               |

CVD  
incidence 751  
stroke  
incidence 157  
IHD  
incidence 245  
MI  
incidence 156

hypertension,  
hypercholesterolemia,  
aspirin use, post  
menopause in women,  
BMI, dietary factor

|                                     |                                                                                                      |   |      |    |        |             |       |                                      |                                     |                                                                                                                                                                                                                                                                                                                                        |
|-------------------------------------|------------------------------------------------------------------------------------------------------|---|------|----|--------|-------------|-------|--------------------------------------|-------------------------------------|----------------------------------------------------------------------------------------------------------------------------------------------------------------------------------------------------------------------------------------------------------------------------------------------------------------------------------------|
| Mahamat-Saleh et al., 2021 (France) | Etude Epidémiologique auprès de femmes de la Mutuelle Générale de l'Education Nationale (E3N) cohort | F | 52.4 | 18 | 67,332 | skin cancer | 2,003 | self-administered food questionnaire | confirmed through pathology reports | age, skin sensitivity to sun exposure, number of nevi, number of freckles, skin color, hair color, family history of skin cancer, levels of residential sun exposure at birth and at baseline, BMI, physical activity, smoking status, education level, and energy intake, coffee intake, and other dietary components of the MD score |
|-------------------------------------|------------------------------------------------------------------------------------------------------|---|------|----|--------|-------------|-------|--------------------------------------|-------------------------------------|----------------------------------------------------------------------------------------------------------------------------------------------------------------------------------------------------------------------------------------------------------------------------------------------------------------------------------------|



|                                          |                                                                            |     |      |      |        |                     |       |     |                                                                                                                    |                                                                                                                                                                             |
|------------------------------------------|----------------------------------------------------------------------------|-----|------|------|--------|---------------------|-------|-----|--------------------------------------------------------------------------------------------------------------------|-----------------------------------------------------------------------------------------------------------------------------------------------------------------------------|
| Kouli et al., 2019<br>(Greece)           | ATTICA study                                                               | M/F | 45   | 8.41 | 2,020  | CVD incidence       | 317   | FFQ | medical records                                                                                                    | age, sex, BMI, smoking habits, physical activity, education level, history of hypertension, hypercholesterolemia, diabetes, metabolic syndrome, fibrinogen                  |
| Stefler et al., 2017<br>(Eastern Europe) | Health Alcohol and Psychosocial Factors in Eastern Europe (HAPIEE) project | M/F | 57   | 7    | 19,333 | all-cause mortality | 1,314 | FFQ | linkage with death registers                                                                                       | age, sex, cohort, education, marital status, household amenities score, smoking, physical activity, total energy intake and vitamin supplement intake                       |
|                                          |                                                                            |     |      |      | 19,263 | CVD mortality       | 438   |     |                                                                                                                    |                                                                                                                                                                             |
|                                          |                                                                            |     |      |      | 19,263 | CHD mortality       | 226   |     |                                                                                                                    |                                                                                                                                                                             |
|                                          |                                                                            |     |      |      | 19,263 | Stroke mortality    | 109   |     |                                                                                                                    |                                                                                                                                                                             |
| Letois et al., 2016<br>(France)          | Three-City cohort                                                          | M/F | 74.2 | 9    | 8,937  | all-cause mortality | 2,016 | FFQ | ascertained from the civil registry by systematic request for all subjects not included in follow-up visits ICD-10 | sex, center, education, income, occupation, smoking, alcohol consumption, history of cardiovascular disease, BMI, depression, diabetes, hypertension, hypercholesterolemia, |

|                                  |                                |     |       |      |       |                     |     |     |                                                                     |                                                                                                                                                                                                                                                                                                                                            |
|----------------------------------|--------------------------------|-----|-------|------|-------|---------------------|-----|-----|---------------------------------------------------------------------|--------------------------------------------------------------------------------------------------------------------------------------------------------------------------------------------------------------------------------------------------------------------------------------------------------------------------------------------|
|                                  |                                |     |       |      |       |                     |     |     |                                                                     | dependence, self-rated health, self-rated diet quality, number of drugs, number of chronic diseases                                                                                                                                                                                                                                        |
| Chrysohoou et al., 2016 (Greece) | Ikaria study of the Blue Zones | M/F | 65    | 4    | 673   | all-cause mortality | 53  | FFQ | NA                                                                  | age, history of hypertension, SBP, DBP, history of hypercholesterolemia, total cholesterol levels, triglycerides, HDL-C, LDL-C, history of diabetes mellitus, glucose levels, history of CVD, metabolic syndrome, waist, obesity, BMI, creatinine clearance, GDS-score, current smoker, education level, physical inactivity, MedDietscore |
| Atkins, et al., 2014 (UK)        | British Regional Heart Study   | M   | 60-79 | 11.3 | 3,269 | all-cause mortality | 907 | FFQ | collected through National Health Service Central Registers (ICD-9) | age, energy intake, smoking, alcohol, physical activity, social class, BMI, and a modified version of the HDI/EDI score not                                                                                                                                                                                                                |
|                                  |                                |     |       |      |       | CVD mortality       | 317 |     |                                                                     |                                                                                                                                                                                                                                                                                                                                            |

|                                   |                                                           |     |    |     |       |                       |     |     |                             |                                                                                                                                                                                                                                                                                                                      |
|-----------------------------------|-----------------------------------------------------------|-----|----|-----|-------|-----------------------|-----|-----|-----------------------------|----------------------------------------------------------------------------------------------------------------------------------------------------------------------------------------------------------------------------------------------------------------------------------------------------------------------|
|                                   |                                                           |     |    |     |       | CVD incidence         | 570 |     |                             | component of interest.                                                                                                                                                                                                                                                                                               |
|                                   |                                                           |     |    |     |       | CHD incidence         | 301 |     |                             |                                                                                                                                                                                                                                                                                                                      |
| Guasch-Ferré et al., 2014 (Spain) | PREvención con Dieta MEDiterránea (PREDIMED) study        | M/F | 67 | 4.8 | 7,216 | all-cause mortality   | 323 | FFQ | verified by medical records | age, sex, the intervention group, body mass index (BMI), smoking status, alcohol intake, educational level, leisure time physical activity, prevalence of diabetes, prevalence of hypertension, prevalence of hypercholesterolemia, use of antihypertensive medication, use of statins, Mediterranean diet adherence |
|                                   |                                                           |     |    |     |       | CVD mortality         | 81  |     |                             |                                                                                                                                                                                                                                                                                                                      |
|                                   |                                                           |     |    |     |       | cancer mortality      | 130 |     |                             |                                                                                                                                                                                                                                                                                                                      |
|                                   |                                                           |     |    |     |       | CVD incidence         | 277 |     |                             |                                                                                                                                                                                                                                                                                                                      |
| Gnagnarella et al., 2013 (Italy)  | Continuous Observation of Smoking Subjects (COSMOS study) | M/F | 57 | 5.7 | 4,336 | lung cancer incidence | 178 | FFQ | NA                          | baseline risk probability and total energy adjusted using the nutrient-density method; fruits and vegetables, fish, red meat, tea and wine intake                                                                                                                                                                    |

|                                               |                                                                                 |     |       |       |         |                             |        |                                   |                                                                                                         |                                                                                                                                                                                                                                                                                                                                              |
|-----------------------------------------------|---------------------------------------------------------------------------------|-----|-------|-------|---------|-----------------------------|--------|-----------------------------------|---------------------------------------------------------------------------------------------------------|----------------------------------------------------------------------------------------------------------------------------------------------------------------------------------------------------------------------------------------------------------------------------------------------------------------------------------------------|
| Buckland et al., 2013 (10 European countries) | European Prospective Investigation into Cancer and Nutrition (EPIC)             | F   | 50.8  | 11.0  | 335,062 | breast cancer incidence     | 10,225 | FFQ or diet history questionnaire | ICD-10                                                                                                  | body mass index, height, education level, physical activity, smoking status, menopausal status, age at menarche, oral contraception use, breastfeeding, age at first full-term pregnancy, use of hormone replacement therapy, saturated fat intake, alcohol intake, total energy intake and mutually adjusted for the other arMED components |
| Agnoli et al., 2013 (Italy)                   | European Prospective Investigation into Cancer and Nutrition (EPIC)-Italy Study | M/F | 50    | 11.28 | 45,275  | colorectal cancer incidence | 435    | FFQ                               | linkage to the regional archive of hospital discharges, and by direct telephone contact where necessary | non-alcoholic energy intake, gender (analysis of entire cohort only), age, BMI, smoking, education, and total physical activity                                                                                                                                                                                                              |
| Dilis et al., 2012 (Greece)                   | European Prospective Investigation into Cancer and                              | M   | 20-86 | 10    | 9,740   | CHD mortality               | NA     | FFQ                               | confirmed through hospital discharge data, medical records                                              | age, energy intake, BMI, height, physical activity, years of schooling, alcohol consumption, smoking                                                                                                                                                                                                                                         |

|                               |                                                                                   |     |       |      |        |                           |       |                                          |                                                                                                                                               |                                                                                                                                                         |
|-------------------------------|-----------------------------------------------------------------------------------|-----|-------|------|--------|---------------------------|-------|------------------------------------------|-----------------------------------------------------------------------------------------------------------------------------------------------|---------------------------------------------------------------------------------------------------------------------------------------------------------|
|                               | Nutrition (EPIC)-Greece Study                                                     | F   |       |      | 14,189 | CHD incidence             | NA    |                                          | or death certificates, and was classified according to the 10 <sup>th</sup> revision of the International Classification of Diseases (ICD-10) | status, arterial blood pressure.                                                                                                                        |
|                               |                                                                                   |     |       |      |        | CHD mortality             | NA    |                                          |                                                                                                                                               |                                                                                                                                                         |
|                               |                                                                                   |     |       |      |        | CHD incidence             | NA    |                                          |                                                                                                                                               |                                                                                                                                                         |
| Misirl et al., 2012 (Greece)  | European Prospective Investigation into Cancer and Nutrition (EPIC)               | M/F | 20-86 | 10.6 | 23,601 | cerebrovascular mortality | 196   | FFQ                                      | ICD-10                                                                                                                                        | age, sex, education, smoking status, body mass index (BMI), height, level of physical activity, hypertension, diabetes, and total energy intake         |
|                               |                                                                                   |     |       |      |        | cerebrovascular incidence | 395   |                                          |                                                                                                                                               |                                                                                                                                                         |
| Buckland et al., 2012 (Spain) | European Prospective Investigation into Cancer and Nutrition (EPIC)-Spanish Study | M/F | 29-69 | 13.4 | 40,622 | all-cause mortality       | 1,915 | electronic dietary history questionnaire | ICD-9, ICD-10                                                                                                                                 | age, sex, physical activity, BMI, waist circumference, educational level, smoking status, intake of energy, alcohol, fruit, vegetables, meat, and dairy |
|                               |                                                                                   |     |       |      |        | CVD mortality             | 416   |                                          |                                                                                                                                               |                                                                                                                                                         |
|                               |                                                                                   |     |       |      |        | cancer mortality          | 956   |                                          |                                                                                                                                               |                                                                                                                                                         |

|                                                        |                                                                                                                         |     |      |      |        |                               |       |                                                                                                                             |                                                                                                                                               |                                                                                                                                                                                                                                                                                                                                                                                                                                                                                          |
|--------------------------------------------------------|-------------------------------------------------------------------------------------------------------------------------|-----|------|------|--------|-------------------------------|-------|-----------------------------------------------------------------------------------------------------------------------------|-----------------------------------------------------------------------------------------------------------------------------------------------|------------------------------------------------------------------------------------------------------------------------------------------------------------------------------------------------------------------------------------------------------------------------------------------------------------------------------------------------------------------------------------------------------------------------------------------------------------------------------------------|
| Buckland et al.,<br>2012 (Spain,<br>Greece, and Italy) | European<br>Prospective<br>Investigation<br>into Cancer and<br>Nutrition<br>(EPIC)-Spain,<br>Greece, and Italy<br>Study | F   | NA   | 9    | 62,284 | Breast<br>cancer<br>incidence | 1,256 | questionnaire                                                                                                               | identified by<br>population cancer<br>registries, and<br>pathology and<br>medical reports,<br>discharge<br>diagnoses or<br>death certificates | educational level, BMI,<br>height, physical activity,<br>smoking status, alcohol<br>consumption and energy<br>intake excluding alcohol,<br>fruit, vegetables, meat, and<br>saturated fat.                                                                                                                                                                                                                                                                                                |
| Samieri et al.,<br>2011 (France)                       | The Three-City<br>study                                                                                                 | M/F | 73.8 | 5.25 | 7,625  | stroke<br>incidence           | 148   | 24-hour<br>dietary recall<br>performed<br>during a<br>face-to-face<br>interview<br>administered<br>by trained<br>dietitians | face-to-face<br>interview or by<br>self-questionnaire                                                                                         | age, sex, education, and<br>center, consumption of<br>fish, meat, pulses, raw<br>vegetables, raw fruits,<br>cooked fruits and<br>vegetables, cereals, regular<br>use of omega-3 rich oils,<br>omega-6 rich oils, butter,<br>goose, or duck fat, alcohol<br>consumption, physical<br>activity, risk factors for<br>stroke (systolic blood<br>pressure, antihypertensive<br>therapy, diabetes, smoking,<br>history of cardiovascular<br>disease, atrial fibrillation),<br>body mass index, |

|                                                  |                                                                                 |     |       |      |         |                                  |     |                          |                                                                                                               |                                                                                                                                                                                                                                                                                                                                                                                                         |
|--------------------------------------------------|---------------------------------------------------------------------------------|-----|-------|------|---------|----------------------------------|-----|--------------------------|---------------------------------------------------------------------------------------------------------------|---------------------------------------------------------------------------------------------------------------------------------------------------------------------------------------------------------------------------------------------------------------------------------------------------------------------------------------------------------------------------------------------------------|
| Bendinelli et al.,<br>2010 (Italy)               | European Prospective Investigation into Cancer and Nutrition (EPIC)-Italy Study | F   | 50    | 7.85 | 29,689  | CHD incidence                    | 154 | FFQ and semiquantitative | death certificates were obtained from the Mortality Registries, and linkage with the hospital discharge files | triglyceridemia, and hypercholesterolemia<br>energy intake, educational level, smoking status, alcohol consumption, body height, body weight, waist circumference, daily non-alcohol caloric intake, hypertension (yes or no), menopausal status, total physical activity index, total meat consumption, vegetable consumption in analyses for fruit, and fruit consumption in analyses for vegetables. |
| Buckland et al.,<br>2010 (10 European countries) | European Prospective Investigation into Cancer and Nutrition (EPIC)             | M/F | 35-70 | 8.9  | 485,028 | gastric adenocarcinoma incidence | 449 | questionnaires           | periodic linkage to regional and national mortality registries                                                | sex, BMI, educational level, smoking status, cigarette smoking intensity, and total energy intake                                                                                                                                                                                                                                                                                                       |

|                                    |                                                                                  |     |       |     |        |                     |       |                       |                                                                                                |                                                                                                                                                                                                                                                                  |
|------------------------------------|----------------------------------------------------------------------------------|-----|-------|-----|--------|---------------------|-------|-----------------------|------------------------------------------------------------------------------------------------|------------------------------------------------------------------------------------------------------------------------------------------------------------------------------------------------------------------------------------------------------------------|
| Benetou et al., 2008 (Greece)      | European Prospective Investigation into Cancer and Nutrition (EPIC)-Greece Study | M/F | NA    | 7.9 | 25,623 | cancer incidence    | 851   | FFQ                   | verified through pathology reports, medical records, discharge diagnoses or death certificates | age, years of schooling, smoking status, body mass index, height, physical activity, ethanol intake, supplement use and total energy intake except for the model for energy intake                                                                               |
| Trichopoulou et al., 2003 (Greece) | European Prospective Investigation into Cancer and Nutrition (EPIC)-Greece Study | M/F | 20-86 | 3.7 | 9,389  | all-cause mortality | 275   | FFQ                   | verified by death certificates and other official sources (ICD-9)                              | age, sex, waist-to-hip ratio, energy-expenditure score, years of education, smoking status, BMI, and total energy intake                                                                                                                                         |
| Barzi et al., 2003 (Italy)         | GISSI-Prevenzione Study                                                          | M/F | 19-90 | 3.5 | 11,246 | all-cause mortality | 1,660 | dietary questionnaire | NA                                                                                             | age, sex, hypertension, HDL-cholesterol, diabetes, smoking, claudication, electrical instability, left ventricular dysfunction, residual myocardial ischemia, dietary supplementation, pharmacological therapies, fish, fruit, raw vegetables, cooked vegetables |

---



BMI, body mass index; CHD, coronary heart disease; CVD, cardiovascular disease; F, female; FFQ, food frequency questionnaire; ICD, international classification of diseases; IHD, ischemic heart disease; M, male; MI, myocardial infarction; NA, not available.



|                            |   |   |   |   |   |   |   |   |   |   |
|----------------------------|---|---|---|---|---|---|---|---|---|---|
| Buckland et al. (2012)     | 1 | 1 | 1 | 1 | 0 | 1 | 1 | 1 | 0 | 7 |
| Samieri et al. (2011)      | 1 | 1 | 1 | 1 | 1 | 1 | 1 | 1 | 1 | 9 |
| Bandinelli et al. (2010)   | 1 | 1 | 1 | 1 | 0 | 0 | 1 | 1 | 0 | 6 |
| Buckland et al. (2010)     | 1 | 1 | 1 | 1 | 0 | 1 | 1 | 1 | 0 | 8 |
| Benetou et al. (2008)      | 1 | 1 | 1 | 1 | 1 | 1 | 1 | 1 | 0 | 8 |
| Trichopoulou et al. (2003) | 1 | 1 | 1 | 0 | 1 | 1 | 1 | 0 | 0 | 6 |
| Barzi et al. (2003)        | 0 | 1 | 1 | 1 | 1 | 0 | 0 | 0 | 0 | 4 |

a Representativeness of the exposed cohort

b Selection of the non-exposed cohort

c Ascertainment of exposure

d Demonstration that outcome of interest was not present at start of study

e Comparability of cohorts on the basis of the design or analysis (adjusted for age)

f Comparability of cohorts on the basis of the design or analysis (adjusted for other factors)

g Assessment of outcome

h Was follow-up long enough for outcomes to occur?

i Adequacy of follow-up of cohort

Table S5 Sensitivity analyses by systematic removal of each study (highest versus lowest category).

| Excluded study                                  | RR          | 95% CI      |             |
|-------------------------------------------------|-------------|-------------|-------------|
| <b>CVD incidence</b>                            |             |             |             |
| All included:                                   | 0.85        | 0.77        | 0.93        |
| Donat-Vargas et al. The Sun project, M/F (2022) | 0.85        | 0.76        | 0.94        |
| Donat-Vargas et al. EPIC-Spain, M/F (2022)      | 0.82        | 0.73        | 0.91        |
| Guasch-Ferré et al. HPFS, M (2021)              | 0.84        | 0.74        | 0.95        |
| Guasch-Ferré et al. NHS, F (2021)               | 0.82        | 0.71        | 0.94        |
| Kouli et al. M/F (2019)                         | 0.85        | 0.77        | 0.94        |
| Sadeghi et al. M/F (2021)                       | 0.83        | 0.74        | 0.93        |
| Atkins, et al. M (2014)                         | 0.87        | 0.80        | 0.94        |
| Guasch-Ferré et al. M/F (2014)                  | 0.87        | 0.79        | 0.95        |
| <b>CHD incidence</b>                            |             |             |             |
| All included:                                   | 0.84        | 0.71        | 0.98        |
| Donat-Vargas et al. EPIC-Spain, M/F (2022)      | 0.79        | 0.66        | 0.95        |
| Guasch-Ferré et al. HPFS, M (2021)              | <b>0.87</b> | <b>0.73</b> | <b>1.05</b> |
| Guasch-Ferré et al. NHS, F (2021)               | <b>0.81</b> | <b>0.64</b> | <b>1.01</b> |
| Sadeghi et al. M/F (2021)                       | 0.81        | 0.69        | 0.96        |
| Atkins, et al. M (2014)                         | <b>0.87</b> | <b>0.74</b> | <b>1.01</b> |
| Bandinelli et al. F (2010)                      | <b>0.86</b> | <b>0.74</b> | <b>1.01</b> |
| <b>Stroke incidence</b>                         |             |             |             |
| All included:                                   | 0.93        | 0.80        | 1.09        |
| Donat-Vargas et al. EPIC-Spain, M/F (2022)      | 0.95        | 0.76        | 1.19        |

|                                    |      |      |      |
|------------------------------------|------|------|------|
| Guasch-Ferré et al. HPFS, M (2021) | 0.90 | 0.75 | 1.07 |
| Guasch-Ferré et al. NHS, F (2021)  | 0.94 | 0.74 | 1.19 |
| Sadeghi et al. M/F (2021)          | 0.91 | 0.79 | 1.05 |
| Samieri et al. M/F (2011)          | 0.96 | 0.85 | 1.07 |
| Cancer incidence                   |      |      |      |
| All included:                      | 1.00 | 0.96 | 1.04 |
| Romanos-Nanclares et al. (2023)    | 0.99 | 0.94 | 1.05 |
| Dianatinasab et al. M/F (2022)     | 1.01 | 0.97 | 1.05 |
| Mahamat-Saleh et al. F (2021)      | 0.99 | 0.94 | 1.04 |
| Gnagnarella et al. M/F (2013)      | 1.01 | 0.97 | 1.04 |
| Buckland et al. F (2013)           | 0.99 | 0.93 | 1.06 |
| Agnoli et al. M/F (2013)           | 1.01 | 0.97 | 1.05 |
| Buckland et al. M/F (2010)         | 1.00 | 0.96 | 1.04 |
| CVD mortality                      |      |      |      |
| All included:                      | 0.77 | 0.67 | 0.88 |
| Torres-Collado et al. M/F (2022)   | 0.79 | 0.69 | 0.90 |
| Guasch-Ferré et al. HPFS, M (2022) | 0.76 | 0.64 | 0.89 |
| Guasch-Ferré et al. NHS, F (2022)  | 0.73 | 0.61 | 0.87 |
| Donat-Vargas et al. M/F (2022)     | 0.79 | 0.69 | 0.90 |
| Zhang et al. M/F (2021)            | 0.73 | 0.62 | 0.85 |
| Sadeghi et al. M/F (2021)          | 0.76 | 0.66 | 0.87 |
| Stefler et al. M/F (2017)          | 0.75 | 0.65 | 0.86 |
| Atkins, et al. M (2014)            | 0.79 | 0.70 | 0.90 |
| Guasch-Ferré et al. M/F (2014)     | 0.79 | 0.69 | 0.90 |
| Buckland et al. M/F (2012)         | 0.90 | 0.70 | 0.91 |
| Cancer mortality                   |      |      |      |
| All included:                      | 0.89 | 0.79 | 1.00 |

|                                    |             |             |             |
|------------------------------------|-------------|-------------|-------------|
| Torres-Collado et al. M/F (2022)   | 0.91        | 0.81        | 1.02        |
| Guasch-Ferré et al. HPFS, M (2022) | 0.91        | 0.80        | 1.04        |
| Guasch-Ferré et al. NHS, F (2022)  | 0.90        | 0.77        | 1.04        |
| Donat-Vargas et al. M/F (2022)     | 0.88        | 0.78        | 1.00        |
| Zhang et al. M/F (2021)            | <b>0.85</b> | <b>0.80</b> | <b>0.91</b> |
| Guasch-Ferré et al. M/F (2014)     | 0.89        | 0.78        | 1.01        |
| Buckland et al. M/F (2012)         | 0.89        | 0.77        | 1.02        |
| All-cause mortality                |             |             |             |
| All included:                      | 0.85        | 0.81        | 0.89        |
| Bonfiglio et al. M/F (2023)        | 0.86        | 0.82        | 0.90        |
| Torres-Collado et al. M/F (2022)   | 0.86        | 0.82        | 0.90        |
| Guasch-Ferré et al. HPFS, M (2022) | 0.85        | 0.81        | 0.90        |
| Guasch-Ferré et al. NHS, F (2022)  | 0.87        | 0.84        | 0.91        |
| Donat-Vargas et al. M/F (2022)     | 0.85        | 0.81        | 0.89        |
| Zhang et al. M/F (2021)            | 0.82        | 0.77        | 0.88        |
| Sadeghi et al. M/F (2021)          | 0.85        | 0.81        | 0.88        |
| Stefler et al. M/F (2017)          | 0.84        | 0.80        | 0.88        |
| Letois et al. M/F (2016)           | 0.85        | 0.81        | 0.90        |
| Chrysohoou et al. M/F (2016)       | 0.82        | 0.76        | 0.89        |
| Atkins, et al. M (2014)            | 0.85        | 0.82        | 0.90        |
| Guasch-Ferré et al. M/F (2014)     | 0.85        | 0.81        | 0.90        |
| Buckland et al. M/F (2012)         | 0.86        | 0.82        | 0.90        |
| Barzi et al. M/F (2003)            | 0.86        | 0.82        | 0.90        |

CHD, coronary heart disease; CI, confidence interval; CVD, cardiovascular disease; F, female; M, male; RR, relative risk.

**Bold:** The bold results indicate differences from the main results obtained when all studies were included.

Table S6 Sensitivity analyses by systematic removal of each study (per 10 g/d olive oil intake)

| Excluded study                                  | RR          | 95% CI      |             |
|-------------------------------------------------|-------------|-------------|-------------|
| <b>CVD incidence</b>                            |             |             |             |
| All included:                                   | 0.93        | 0.88        | 0.98        |
| Donat-Vargas et al. The Sun project, M/F (2022) | 0.93        | 0.88        | 0.98        |
| Donat-Vargas et al. EPIC-Spain, M/F (2022)      | 0.91        | 0.84        | 0.98        |
| Guasch-Ferré et al. HPFS, M (2021)              | 0.94        | 0.89        | 0.99        |
| Guasch-Ferré et al. NHS, F (2021)               | 0.93        | 0.88        | 0.99        |
| Guasch-Ferré et al. M/F (2014)                  | 0.95        | 0.85        | 0.97        |
| Misirl et al. M/F (2012)                        | 0.91        | 0.85        | 0.97        |
| <b>CHD incidence</b>                            |             |             |             |
| All included:                                   | 0.96        | 0.90        | 1.02        |
| Donat-Vargas et al. EPIC-Spain, M/F (2022)      | 0.94        | 0.86        | 1.03        |
| Guasch-Ferré et al. HPFS, M (2021)              | 0.98        | 0.92        | 1.04        |
| Guasch-Ferré et al. NHS, F (2021)               | 0.98        | 0.91        | 1.04        |
| Bendinelli et al. (2010)                        | 0.97        | 0.91        | 1.04        |
| Dilis et al. M (2012)                           | 0.93        | 0.86        | 1.01        |
| Dilis et al. F (2012)                           | 0.94        | 0.87        | 1.01        |
| <b>Stroke incidence</b>                         |             |             |             |
| All included:                                   | 0.95        | 0.92        | 0.98        |
| Donat-Vargas et al. EPIC-Spain, M/F (2022)      | 0.94        | 0.90        | 0.99        |
| Guasch-Ferré et al. HPFS, M (2021)              | 0.93        | 0.90        | 0.97        |
| Guasch-Ferré et al. NHS, F (2021)               | 0.95        | 0.90        | 0.99        |
| Misirl et al. M/F (2012)                        | <b>0.97</b> | <b>0.93</b> | <b>1.00</b> |

| Cancer incidence                   |             |             |             |
|------------------------------------|-------------|-------------|-------------|
| All included:                      | 0.99        | 0.97        | 1.01        |
| Romanos-Nanclares et al. (2023)    | 0.99        | 0.96        | 1.02        |
| Dianatinasab et al. M/F (2022)     | 0.99        | 0.97        | 1.01        |
| Gnagnarella et al. M/F (2013)      | 0.99        | 0.98        | 1.01        |
| Agnoli et al. M/F (2013)           | 0.99        | 0.96        | 1.02        |
| Buckland et al. F (2012)           | 0.99        | 0.97        | 1.01        |
| Buckland et al. M/F (2010)         | 0.99        | 0.97        | 1.01        |
| Benetou et al. M/F (2008)          | 0.99        | 0.97        | 1.02        |
| CVD mortality                      |             |             |             |
| All included:                      | 0.92        | 0.87        | 0.97        |
| Torres-Collado et al. M/F (2022)   | 0.92        | 0.87        | 0.98        |
| Guasch-Ferré et al. HPFS, M (2022) | 0.91        | 0.86        | 0.97        |
| Guasch-Ferré et al. NHS, F (2022)  | 0.91        | 0.85        | 0.97        |
| Donat-Vargas et al. M/F (2022)     | 0.92        | 0.87        | 0.97        |
| Zhang et al. M/F (2021)            | 0.93        | 0.88        | 0.98        |
| Guasch-Ferré et al. M/F (2014)     | 0.93        | 0.88        | 0.97        |
| Buckland et al. M/F (2012)         | 0.93        | 0.88        | 0.98        |
| Misirl et al. M/F (2012)           | 0.91        | 0.87        | 0.94        |
| Cancer mortality                   |             |             |             |
| All included:                      | 0.96        | 0.91        | 1.00        |
| Torres-Collado et al. M/F (2022)   | 0.97        | 0.93        | 1.01        |
| Guasch-Ferré et al. HPFS, M (2022) | 0.97        | 0.93        | 1.01        |
| Guasch-Ferré et al. NHS, F (2022)  | 0.95        | 0.90        | 1.01        |
| Donat-Vargas et al. M/F (2022)     | 0.95        | 0.91        | 1.00        |
| Zhang et al. M/F (2021)            | <b>0.94</b> | <b>0.91</b> | <b>0.98</b> |
| Guasch-Ferré et al. M/F (2014)     | 0.96        | 0.91        | 1.00        |



|                                    |      |      |      |
|------------------------------------|------|------|------|
| Buckland et al. M/F (2012)         | 0.95 | 0.90 | 1.01 |
| All-cause mortality                |      |      |      |
| All included:                      | 0.92 | 0.90 | 0.94 |
| Bonfiglio et al. M/F (2023)        | 0.92 | 0.90 | 0.94 |
| Torres-Collado et al. M/F (2022)   | 0.92 | 0.90 | 0.94 |
| Guasch-Ferré et al. HPFS, M (2022) | 0.92 | 0.90 | 0.93 |
| Guasch-Ferré et al. NHS, F (2022)  | 0.93 | 0.91 | 0.94 |
| Donat-Vargas et al. M/F (2022)     | 0.92 | 0.90 | 0.94 |
| Zhang et al. M/F (2021)            | 0.92 | 0.91 | 0.94 |
| Guasch-Ferré et al. M/F (2014)     | 0.92 | 0.90 | 0.94 |
| Buckland et al. M/F (2012)         | 0.92 | 0.90 | 0.94 |
| Trichopoulou et al. M/F (2003)     | 0.92 | 0.90 | 0.93 |

CHD, coronary heart disease; CI, confidence interval; CVD, cardiovascular disease; F, female; M, male; RR, relative risk.

**Bold:** The bold results indicate differences from the main results obtained when all studies were included.

Table S7 GRADE evidence table for the association of olive oil intake with the risk of cardiovascular disease, cancer, and all-cause mortality.

| Quality assessment      |                       |              |                      |              |                      |                        | No of patients |                   | Effect                    |          | Quality          | Importance |
|-------------------------|-----------------------|--------------|----------------------|--------------|----------------------|------------------------|----------------|-------------------|---------------------------|----------|------------------|------------|
| No of studies           | Design                | Risk of bias | Inconsistency        | Indirectness | Imprecision          | Other considerations   | Participants   | Case (event rate) | Relative (95% CI)         | Absolute |                  |            |
| <b>CVD incidence</b>    |                       |              |                      |              |                      |                        |                |                   |                           |          |                  |            |
| 8                       | Observational studies | No serious   | No serious           | No serious   | No serious           | Dose-response gradient | 168,574        | 14,021            | RR 0.85<br>(0.77 to 0.93) | -        | ⊕⊕⊕O<br>MODERATE | IMPORTANT  |
|                         |                       |              |                      |              |                      |                        |                | 8.32%             |                           | -        |                  |            |
| <b>CHD incidence</b>    |                       |              |                      |              |                      |                        |                |                   |                           |          |                  |            |
| 5                       | Observational studies | No serious   | Serious <sup>1</sup> | No serious   | No serious           | Dose-response gradient | 170,761        | 8,190             | RR 0.84<br>(0.71 to 0.98) | -        | ⊕⊕OO<br>LOW      | IMPORTANT  |
|                         |                       |              |                      |              |                      |                        |                | 4.80%             |                           | -        |                  |            |
| <b>Stroke incidence</b> |                       |              |                      |              |                      |                        |                |                   |                           |          |                  |            |
| 5                       | Observational studies | No serious   | No serious           | No serious   | Serious <sup>2</sup> | Dose-response gradient | 145,428        | 5,045             | RR 0.93<br>(0.80 to 1.09) | -        | ⊕⊕OO<br>LOW      | IMPORTANT  |
|                         |                       |              |                      |              |                      |                        |                | 3.47%             |                           | -        |                  |            |

| Cancer incidence |                       |            |                         |                      |                      |                           |           |        |                           |   |                  |           |
|------------------|-----------------------|------------|-------------------------|----------------------|----------------------|---------------------------|-----------|--------|---------------------------|---|------------------|-----------|
| 7                | Observational studies | No serious | No serious              | No serious           | Serious <sup>2</sup> | Dose-response gradient    | 1,648,841 | 24,353 | RR 1.00<br>(0.96 to 1.04) | - | ⊕⊕○○<br>LOW      | IMPORTANT |
|                  |                       |            |                         |                      |                      |                           |           | 0.99%  |                           | - |                  |           |
| CVD mortality    |                       |            |                         |                      |                      |                           |           |        |                           |   |                  |           |
| 10               | Observational studies | No serious | Serious <sup>1</sup>    | No serious           | No serious           | Dose-response gradient    | 702,831   | 49,257 | RR 0.77<br>(0.67 to 0.88) | - | ⊕⊕○○<br>LOW      | IMPORTANT |
|                  |                       |            |                         |                      |                      |                           |           | 7.01%  |                           | - |                  |           |
| CHD mortality    |                       |            |                         |                      |                      |                           |           |        |                           |   |                  |           |
| 1                | Observational studies | No serious | Undetected <sup>3</sup> | Serious <sup>4</sup> | Serious <sup>2</sup> | No dose-response gradient | 19,263    | 226    | RR 1.23<br>(0.71 to 2.16) | - | ⊕○○○<br>VERY LOW | IMPORTANT |
|                  |                       |            |                         |                      |                      |                           |           | 1.17%  |                           | - |                  |           |
| Stroke mortality |                       |            |                         |                      |                      |                           |           |        |                           |   |                  |           |
| 2                | Observational studies | No serious | No serious              | Serious <sup>5</sup> | Serious <sup>2</sup> | No dose-response gradient | 540,381   | 5,714  | RR 1.04<br>(0.67 to 1.62) | - | ⊕○○○<br>VERY LOW | IMPORTANT |
|                  |                       |            |                         |                      |                      |                           |           | 1.06%  |                           | - |                  |           |
| Cancer mortality |                       |            |                         |                      |                      |                           |           |        |                           |   |                  |           |
| 7                | Observational studies | No serious | No serious <sup>6</sup> | No serious           | Serious <sup>2</sup> | Dose-response             | 674,834   | 56,569 | RR 0.89                   | - | ⊕⊕○○             | IMPORTANT |

|                            |                       |            |                      |            |            |                        |         |         |                        |   |             |           |
|----------------------------|-----------------------|------------|----------------------|------------|------------|------------------------|---------|---------|------------------------|---|-------------|-----------|
|                            | 1 studies             |            |                      |            |            | gradient               |         | 8.38%   | (0.79 to 1.00)         | - | LOW         | NT        |
| <b>All-cause mortality</b> |                       |            |                      |            |            |                        |         |         |                        |   |             |           |
| 14                         | Observational studies | No serious | Serious <sup>1</sup> | No serious | No serious | Dose-response gradient | 723,224 | 176,729 | RR 0.85 (0.82 to 0.89) | - | ⊕⊕○○<br>LOW | IMPORTANT |
|                            |                       |            |                      |            |            |                        |         | 24.4%   |                        | - |             |           |

CHD, coronary heart disease; CI, confidence interval; CVD, cardiovascular disease; F, female; M, male; RR, relative risk

<sup>1</sup> Downgrade for substantial heterogeneity.

<sup>2</sup> Downgrade for serious imprecision, as the upper bound of the 95% CI includes the null value and bounds of 95% CI reaching the level of clinical significance.

<sup>3</sup> Only one study contributed to the data.

<sup>4</sup> Downgrade for serious indirectness as only one study contributed to the data.

<sup>5</sup> Downgrade for serious indirectness as only two studies contributed to the data.

<sup>6</sup> No downgrade for inconsistency. Although  $I^2 = 79.1\%$ , the value of  $I^2$  was decreased to  $0.0\%$  after removing the study by Zhang et al. ( $I^2 = 0.0\%$ ,  $P = 0.575$ ).

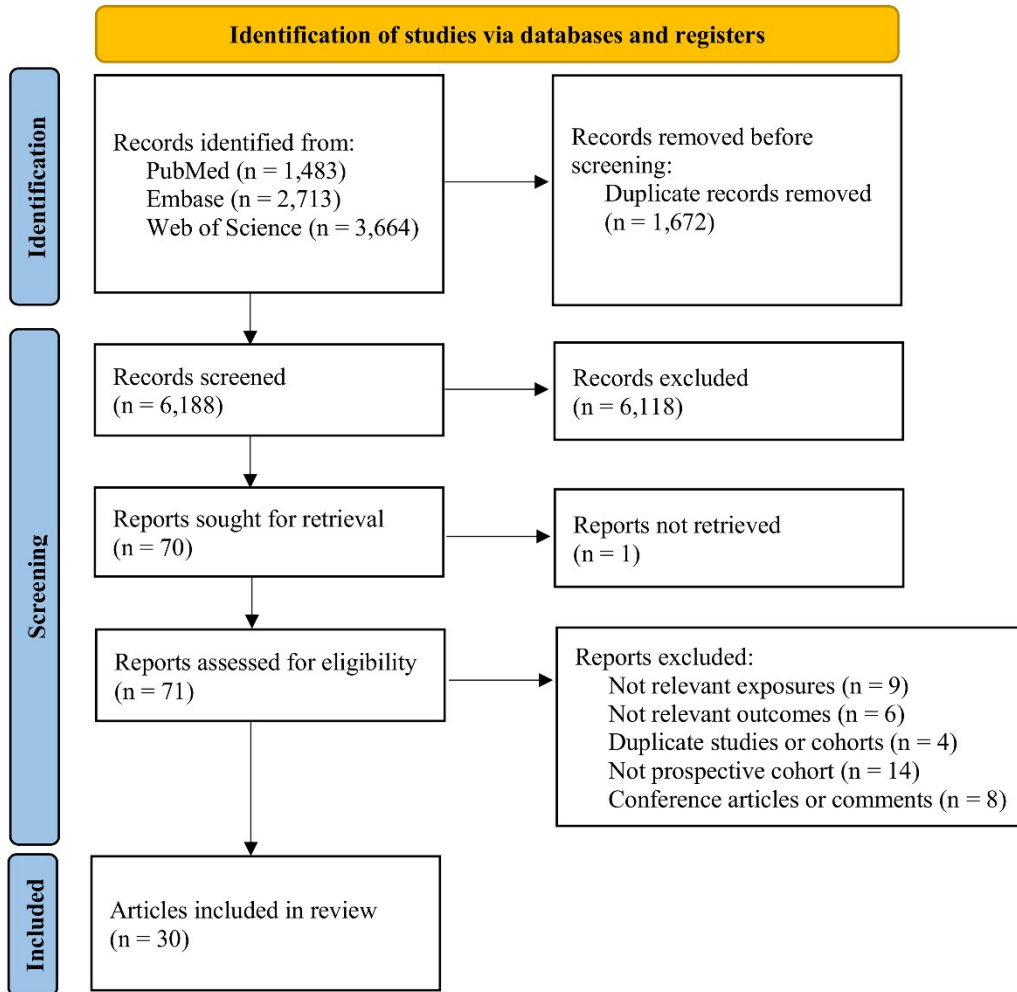

Fig. S1 The flowchart of article selection.

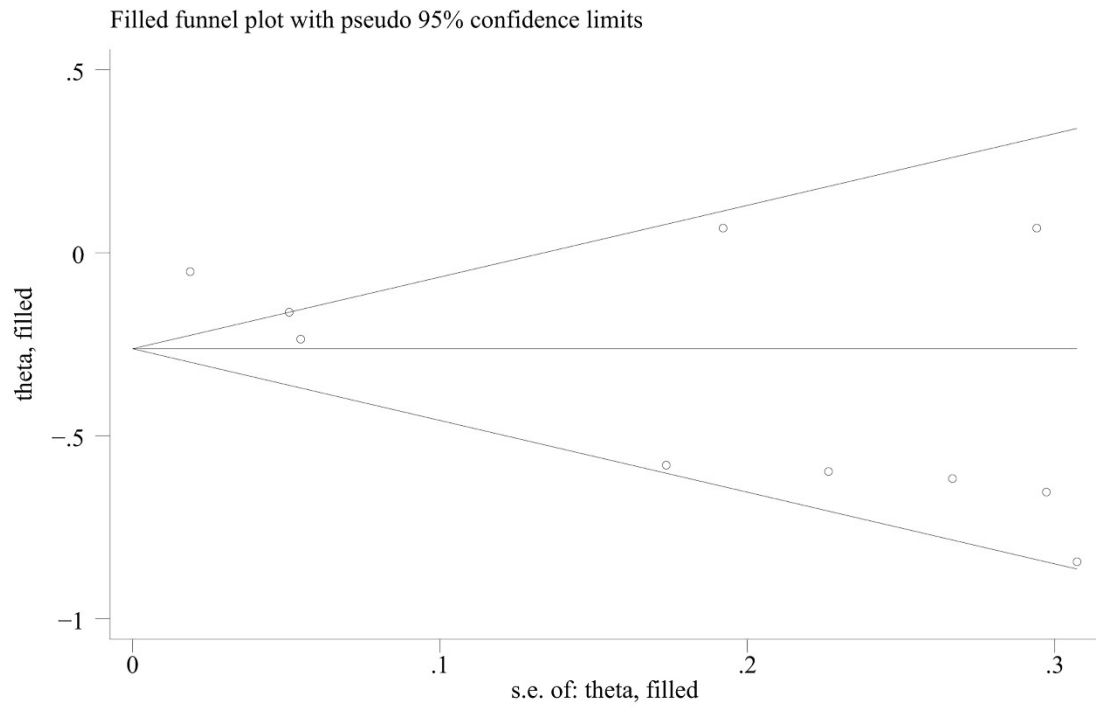

Fig. S2 Funnel plot for publication bias for risk of CVD mortality with highest versus lowest olive oil intake levels.

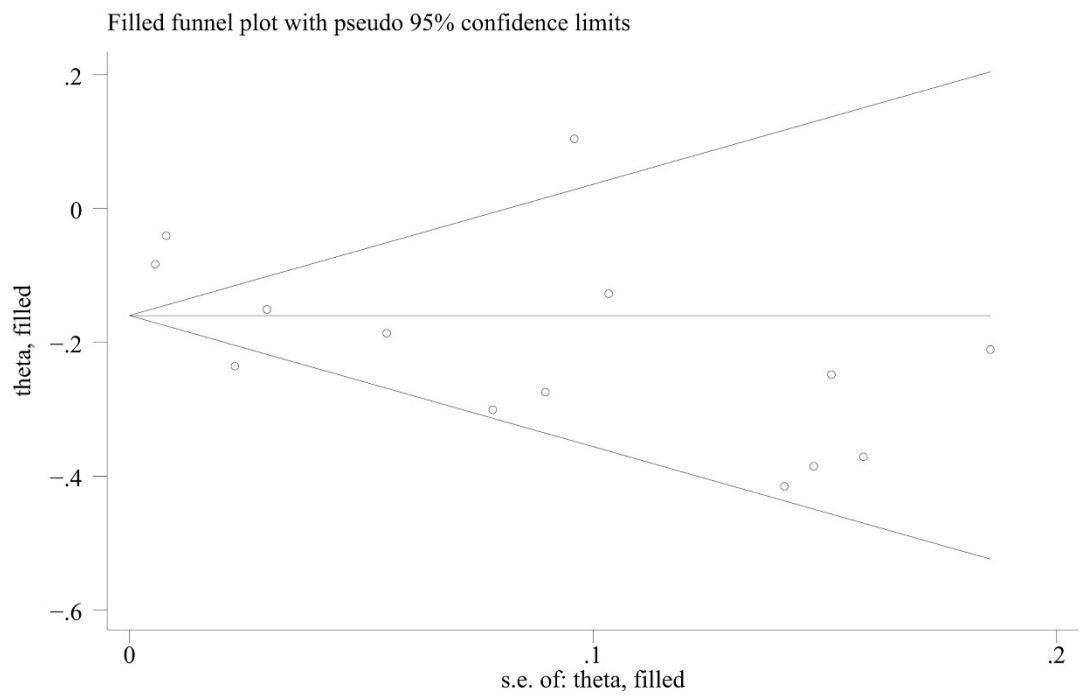

Fig. S3 Funnel plot for publication bias for risk of all-cause mortality with highest versus lowest olive oil intake levels.
